# Supplementary material for: High-Performance Reversible Furan–Maleimide Resins Based on Furfuryl Glycidyl Ether and Bismaleimides
Source: MDPI journal article supplement (doi:10.3390/polym15163470), 2023-08-19
Supplement: s1 [file s1]

# Supplementary Materials

## 1. Structural characterization of monomers

### 1.1. Furfuryl glycidyl ether (FGE)

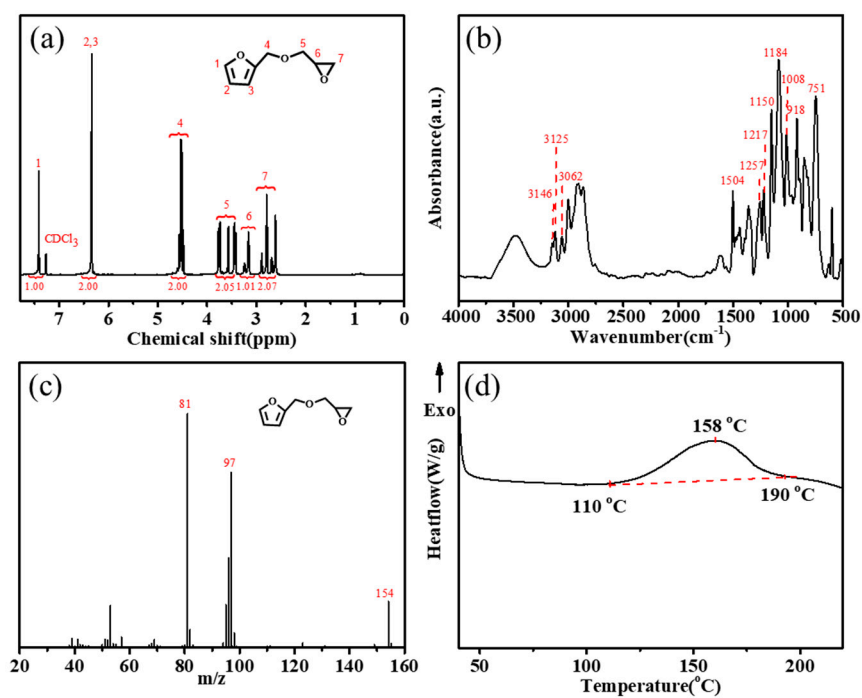

**Figure S1.**  $^1\text{H}$ -NMR spectra (a), FT-IR spectra (b), EI-MS spectra (c), and DSC curve (d).

### 1.2. *N, N'*-hexamethylene-bismaleimide (HBMI)

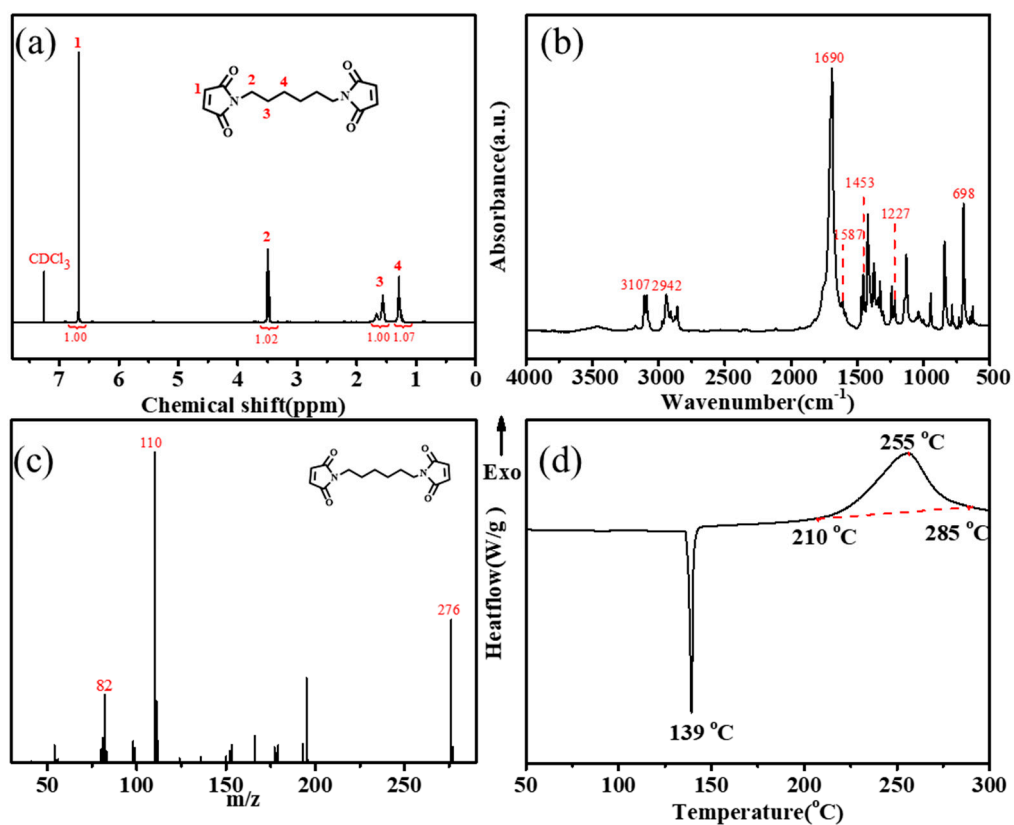

**Figure S2.**  $^1\text{H}$ -NMR spectra (a), FT-IR spectra (b), EI-MS spectra (c), and DSC curve (d).

### 1.3. Investigation of the reaction temperatures of FGE-ODA-BMI resins

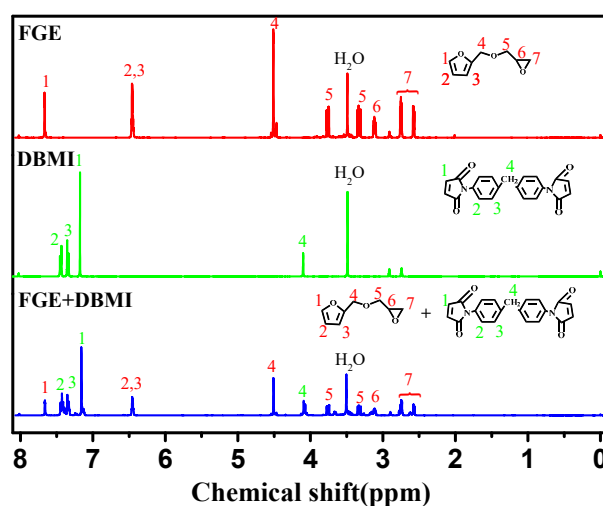

**Figure S3.**  $^1\text{H}$ -NMR spectra of FGE, DBMI and FGE+DBMI (the mixture after heating at 55 °C for 30 min).

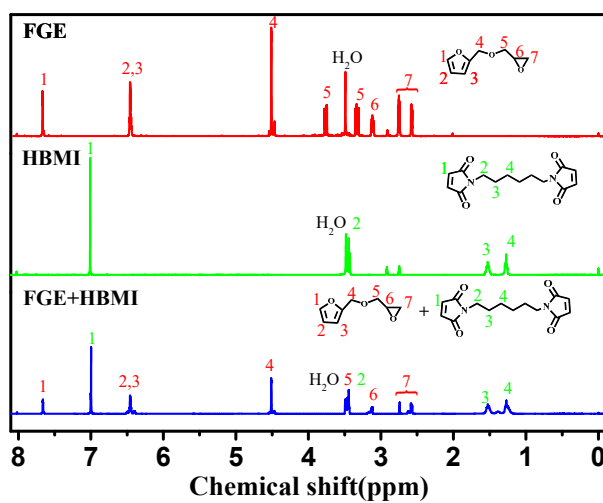

**Figure S4.** <sup>1</sup>H-NMR spectra of FGE, HBMI and FGE+HBMI (the mixture after heating at 55 °C for 30 min).

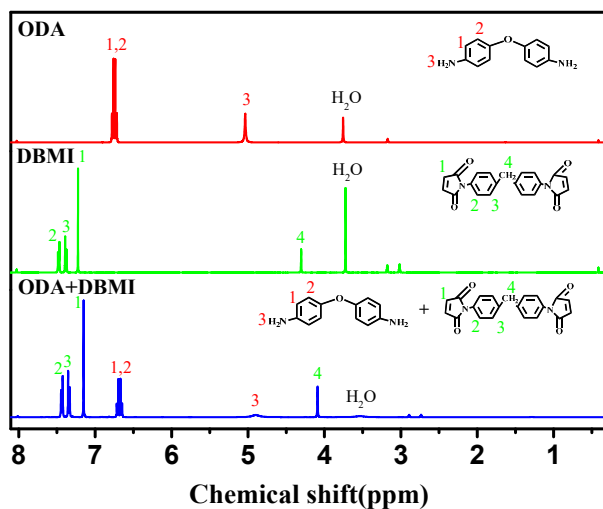

**Figure S5.** <sup>1</sup>H-NMR spectra of ODA, DBMI and ODA+DBMI (the mixture after heating at 125 °C for 30 min).

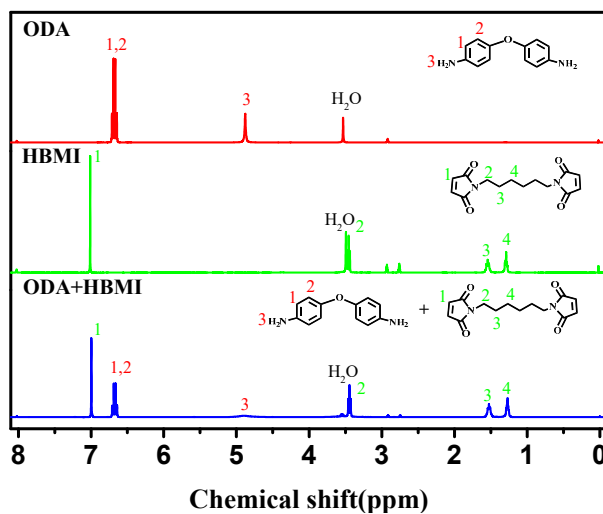

**Figure S6.** <sup>1</sup>H-NMR spectra of ODA, HBMI and ODA+HBMI (the mixture after heating at 125 °C for 30 min).

## 2. Curing procedures and structural characterization of FGE-ODA-HBMI resin

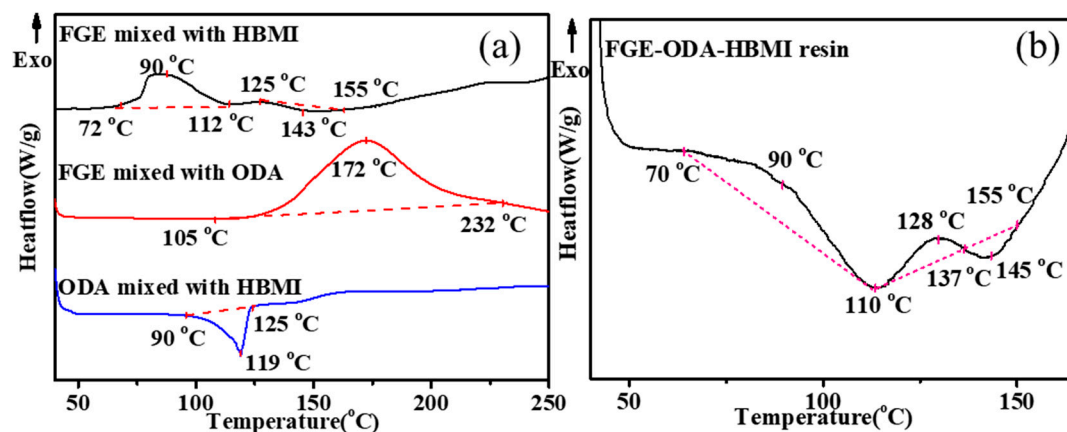

Figure S7. DSC curves of FGE mixed with HBMI, FGE mixed with ODA, ODA mixed with HBMI (a), DSC curves of FGE-ODA-HBMI resin (b).

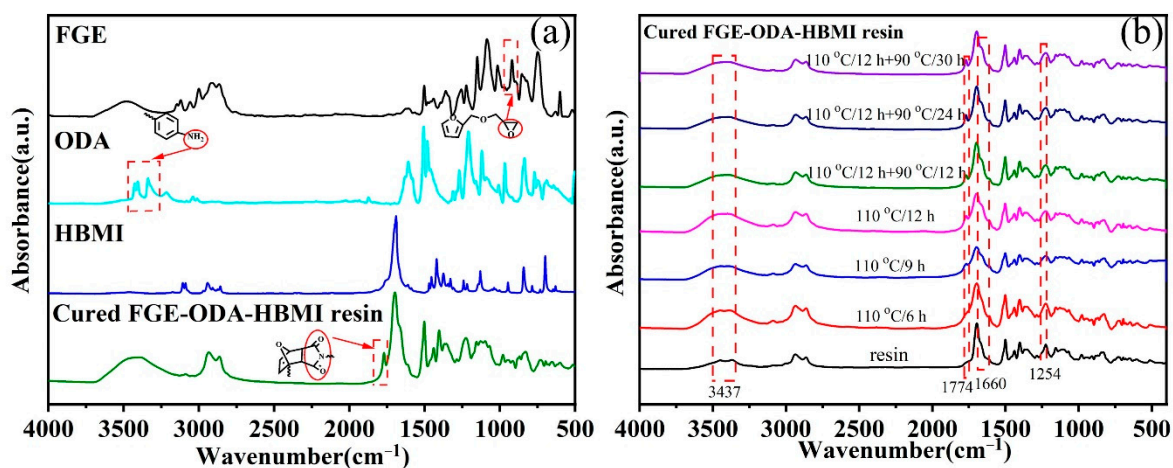

Figure S8. FT-IR spectra of the cured FGE-ODA-HBMI resin and its raw materials(a), and FGE-ODA-HBMI resin at different curing stage (b). The characteristic groups (red circles) are circled and pointed to the characteristic absorption peaks (dashed boxes) in the picture.

## 3. Reversible performance of the cured FGE-ODA-BMI resins

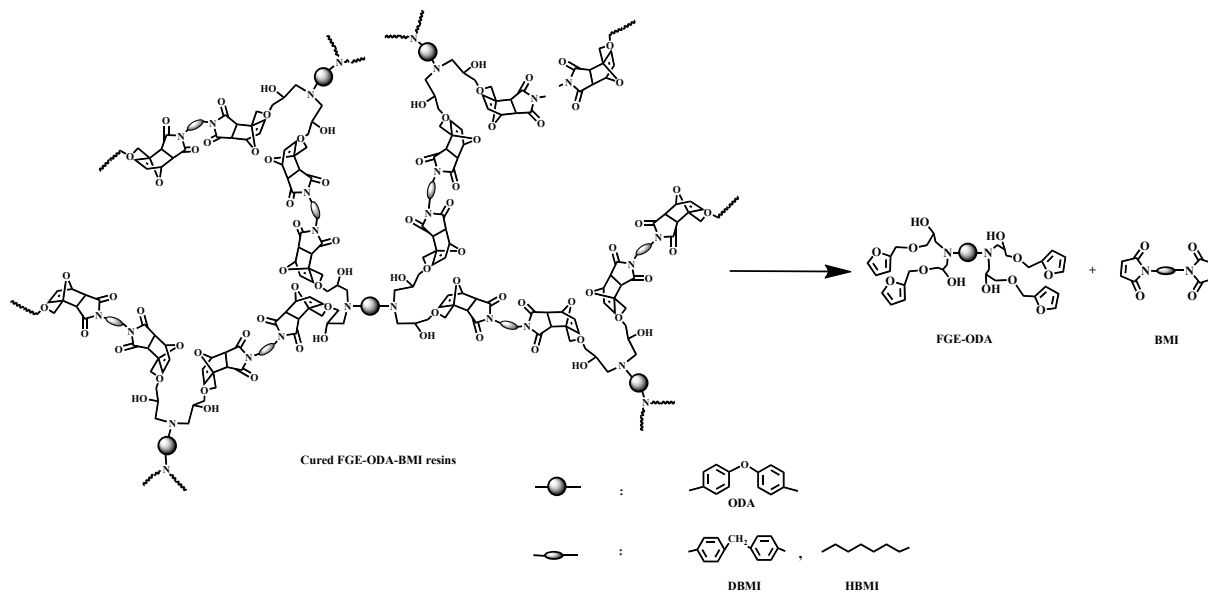

**Figure S9.** Schematic diagram of r-DA reaction of cured resin.

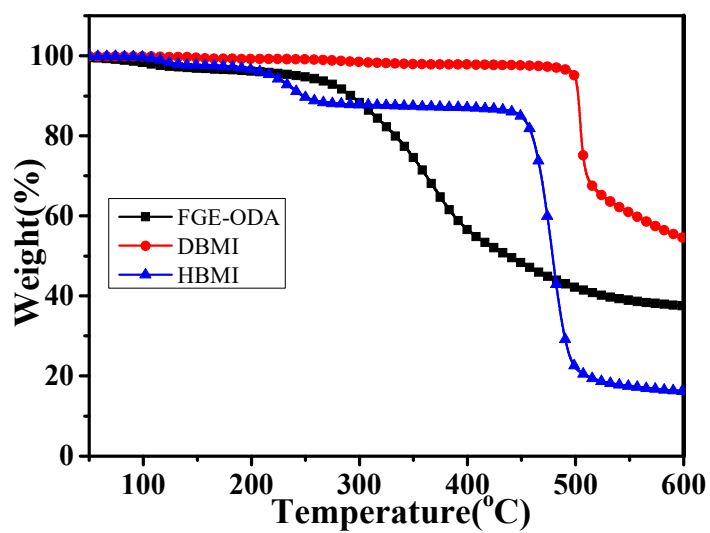

**Figure S10.** TGA curves of FGE-ODA, DBMI and HBMI.

#### 4. The sol-gel transformation process of the cured FGE-ODA-HBMI resin

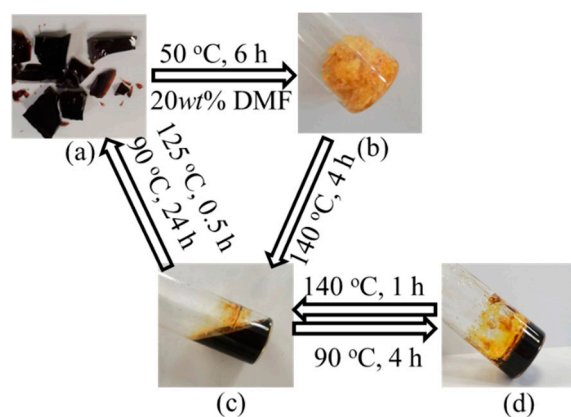

**Figure S11.** The photos of sol-gel transformation process for the cured FGE-ODA-HBMI resin: the small fragments of cured resin (a), the swelled state of cured resin (b), the dissolved state of cured resin (c), the gel state of cured resin (d).

## 5. The hot-pressing process of cured resins

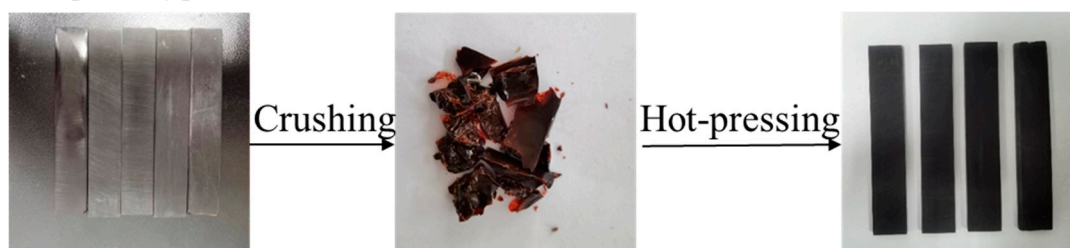

**Figure S12.** The schematic diagram of the hot-pressing process of cured resins.
